# Temporal Microbial Community Dynamics within a Unique Acid Saline Lake

1 **Noor-ul-Huda Ghori<sup>1,2\*</sup>, Michael. J. Wise<sup>2,3</sup>, Andrew. S. Whiteley<sup>1</sup>**

2 <sup>1</sup>Microbial molecular and ecology group, The School of Agriculture and Environment (SAgE), The  
3 University of Western Australia, Perth, WA, Australia

4 <sup>2</sup>The Marshall Centre, The School of Biomedical Sciences, The University of Western Australia,  
5 Perth, WA, Australia

6 <sup>3</sup>The School of Computer Sciences and Engineering, The University of Western Australia, Perth,  
7 WA, Australia

8 **\* Correspondence:**

9 Corresponding Author

10 Noor-Ul-Huda Ghori

11 noor-ul-huda.ghori@uwa.edu.au

12

13 **Keywords: Polyextremophile<sup>1</sup>, 16S rRNA<sup>2</sup>, 18S rRNA<sup>3</sup>, Temporal microbial dynamics<sup>4</sup>, Acid**

14 **Saline<sup>5</sup>.**

15

16

17 **Abstract**

18 Lake Magic is one of the acidic hypersaline lakes (ca. 1 km in diameter) present within the Yilgarn  
19 Craton in WA. This unique lake exhibits extremely low pH (<1.6) coupled to very high salinity (32%  
20 TDS) with the highest concentration of aluminium (1774 mg/L) and silica (510 mg/L) in the world.  
21 Previous studies on Lake Magic diversity has revealed that the lake hosts acidophilic, acidotolerant,  
22 halophilic and halotolerant bacterial species. These studies provide indicators of the population  
23 residing within the lake. However, they do not emphasize the survival mechanisms adopted by the  
24 resident microorganisms and how the diversity of microbial populations residing within the lake  
25 changes during the dynamic stages of flooding, evapo-concentration and desiccation. We have studied  
26 the bacterial and fungal diversity in Lake Magic via amplicon sequencing and functional analysis  
27 through different stages of the lake in a span of one year, in the salt and sediment layer. Our results  
28 highlight that the diversity in Lake Magic is strongly driven by the pH and salt concentrations at  
29 different stages of the lake. The microbial community becomes more specialised in specific functions  
30 during more extreme stages. This also suggests that microbial interactions are involved in stabilising  
31 the ecosystem and is responsible for the resistance and resilience of these communities as the  
32 interactions of these microbes create a safe haven for other microbes to survive during more extreme  
33 stages.

34

35

## 36 **1 Introduction**

37 Acid saline lakes represent one of the most extreme aquatic environments on Earth. They are poly-  
38 extreme ecosystems, exhibiting extremely acidic pH and salinities close to saturation. Such  
39 environments are of significant microbial interest as they host organisms that are not only capable of  
40 withstanding pH and salinity stress, but also survive in the presence of additional stressors such as high  
41 metal concentrations and low nutrients (Mormile *et al.*, 2007; Heidelberg *et al.*, 2013; Johnson *et al.*,  
42 2015; Zaikova *et al.*, 2018). Moreover, they serve as a reservoir of novel microbial functions, such as  
43 acidophilic microorganisms that have been used for extracting metal ores from sulphide minerals.  
44 Hence, such environments are of significant interest to scientists interested in understanding the  
45 fundamental concepts of microbial mechanisms used to cope with significant stressors, as well as  
46 applied areas developing microbial consortia for bioprocessing applications (Dopson *et al.*, 2017).

47

48 Lake Magic is one of the acidic hypersaline lakes (ca. 1 km in diameter) present within the Yilgarn  
49 Craton in WA. This unique lake exhibits extremely low pH (<1.6) coupled to very high salinity (32%  
50 TDS) with the highest concentration of aluminum (1774 mg/L) and silica (510 mg/L) in the world  
51 (Bowen and Benison 2009; Conner and Benison, 2013). Lake Magic, similar to other lakes in WA, has  
52 dynamic and characteristic stages of lake transformation, including flooding, evapo-concentration and  
53 desiccation that are driven by the local seasons (Bowen and Benison 2009; Conner and Benison, 2013).  
54 The lake is fed via both regional acidic groundwater and infrequent precipitation (Benison *et al.*, 2007).  
55 Recent studies of the microbial diversity of Lake Magic has revealed that the lake hosts acidophilic,  
56 acidotolerant, halophilic and halotolerant bacterial species (Zaikova *et al.*, 2018). Moreover, fluid  
57 inclusions of halite crystals from Lake Magic, exhibited the presence of micro-algae and prokaryotes  
58 trapped within them (Conner and Benison, 2013). More recently, metagenomic analyses of lake water,  
59 groundwater and within the sediment of Lake Magic revealed that the lake is dominated by only a few

60 species, such as *Salinisphaera*, and has a low representation of other bacterial species (Zaikova *et al.*,  
61 2018). Interestingly, the pelagic zone of the lake was abundant in eukaryotes, including fungi and green  
62 algae, giving rise to the bright yellow colour of the lake (Zaikova *et al.*, 2018, Conner and Benison,  
63 2013). These studies provide indicators of the population residing within the lake and the functional  
64 niches they occupy. However, they do not emphasize the survival mechanisms adopted by the resident  
65 microorganisms and how the diversity of microbial populations residing within the lake changes during  
66 different transformational stages of the lake.

67  
68 Molecular approaches to understand the dynamics of Yilgarn Craton lakes in the past have focused  
69 primarily on spatial composition (Mormile *et al.*, 2009; Johnson *et al.*, 2015; Zaikova *et al.*, 2018;  
70 Aerts *et al.*, 2019). However, these studies implicitly assume that a single time point can provide a  
71 comprehensive representation of the community members. In opposition, temporal approaches to study  
72 microbial community dynamics have recently revealed considerable variability within microbial  
73 community compositions over time (Ju and Zhang, 2014; Chénard *et al.*, 2017; Nagarkar *et al.*, 2018;  
74 Cruaud *et al.*, 2019), showing that some taxa remain consistent in their abundance whilst others exhibit  
75 sudden blooms (Nagarkar *et al.*, 2018).

76  
77 We hypothesize that the large fluctuations in environmental parameters during lake transformations  
78 are key drivers which will lead to marked changes in microbial populations, and contribute to the  
79 mechanisms driving the dynamics of these communities (Cruaud *et al.*, 2019). Therefore, studying the  
80 temporal dynamics of microbial communities in poly-extreme ecosystems such as Lake Magic could  
81 reveal crucial information about the trophic interactions and survival mechanisms (Nagarkar *et al.*,  
82 2018). This study attempts to investigate the diversity and functional dynamics of bacterial, archaeal  
83 (referenced as ‘bacterial’ from hereon) and fungal communities, over a period of one year. Using 16S  
84 rRNA gene and ITS gene sequencing data, we elucidate the diversity patterns generated during lake

## Diversity dynamics of Lake Magic

85 transformations and assess likely mechanisms the resident microorganisms adopt in order to survive in  
86 the face of multiple stressors.

87

## 88 **2 Materials and Methods**

89

### 90 **2.1 Sample collection**

91 Samples were collected from Lake Magic for every lake stage in a span of one year (July 2017-July  
92 2018). Multiple sampling sites were chosen around the lake to eradicate a spatial sampling effect.  
93 Sediment samples were taken as cores, which were divided into salt mat and sediment layers (**Figure**  
94 **1**). All samples were taken with sterile cores and spatulas. After every sample the cores and spatulas  
95 were sterilized with 70% ethanol. A total of 40 sediment samples and 40 salt mat samples (8 cores for  
96 each time point) were collected. Temperature, pH, and salinity were measured for each sampling point.  
97 All samples were kept frozen at -20°C in 50 ml Falcon tubes until further processing.

98

### 99 **2.2 DNA extraction, PCR and amplicon sequencing**

100 DNA from sediment and salt mat samples was extracted using a method developed for acid saline  
101 sediments. Briefly, 0.4g sediment sample in 2ml tubes containing glass beads. To this 900µl of  
102 extraction buffer (consisting of 0.2M sodium phosphate buffer, 0.2% CTAB, 0.1M NaCl and 50mM  
103 EDTA), 100 µl of 10% SDS and 10 µl of Proteinase K (20 mg/ml). The mixture was kept at -80C for  
104 5 min and then heated at 70C for 20 min. The mixture was subjected to mechanical agitation at 20Hz  
105 for 20min after which the tubes were kept on ice for 5 min. The mixture was centrifuged at 10, 000 x  
106 g for 5 min. To the supernatant 750 µl of chilled phenol-chloroform-isoamyl (pH 8) solution was added  
107 and centrifuged for 20 min at 10, 000 x g. Aqueous layer was transferred to sterile tube and 600 µl of

108 chilled chloroform -isoamyl (pH 8) solution was added. The mixture was centrifuged at 10,000 x g for  
109 5 min. Next, to the aqueous layer 650 µl of 20% PEG, 2.5 M NaCl was added and incubated at 4°C for  
110 overnight. The solution was centrifuged for 20 min at 10,000 x g. The obtained pellet was washed  
111 with 70% ice cold ethanol and 2 µl glycogen. The final pellet was dissolved in 50 µl of TE buffer. All  
112 extractions were carried out in triplicate. Tubes containing no sample were incorporated as extraction  
113 blanks (controls) and were treated identical to sample extractions. DNA concentration was measured  
114 through fluorometry using a Qubit dsDNA HS Assay Kit with a Qubit 2.0 fluorometer (Life  
115 Technologies).

116

117 Extracted DNA from all timepoints were diluted 10-fold prior to PCR amplification of the 16S rRNA  
118 and ITS genes. All PCR reactions were carried out in triplicate. PCR amplification of the 16S rRNA  
119 gene V4-V5 region was performed using the universal PCR primer set 515F and 806R, targeting  
120 members within both bacterial and archaeal domains (16). The forward primer included the addition  
121 of an Ion Torrent PGM sequencing adapter, a GT spacer and a unique Golay barcode to facilitate  
122 multiplexed sequencing. Barcoded PCR reaction mixtures (20 µl) consisted of DNA template (1 µl),  
123 universal primer mix (untagged 515F and 806R at a final concentration of 0.2 µM), tagged 515F primer  
124 (0.2 µM), 600 ng BSA (Life technologies) and 2.5 x 5' Hot Master Mix (5Primer, Australia). The PCR  
125 cycle was set at 94°C for 2 min followed by 25 cycles of 94°C for 45 sec, 50°C for 60 sec and 65°C for  
126 90. This was followed by 2 cycles of 94°C for 45 sec, 65°C for 90 sec and final extension at 65°C for 10  
127 min.

128

129 Amplification of the fungal component was carried out using the universal primer set ITS1 F and ITS2  
130 R, with the addition of an Ion Torrent PGM sequencing adapter, a GT spacer and a unique Golay

## Diversity dynamics of Lake Magic

131 barcode to the forward primer. The barcoded PCR primer mixtures (20  $\mu$ l) included DNA template (1  
132  $\mu$ l), universal primer mix (untagged ITS1 F and ITS2 R at a final concentration of 0.2  $\mu$ M), 600 ng  
133 BSA (Life technologies), tagged ITS1 F primer (0.2  $\mu$ M) and 2.5x 5' Hot Master Mix (5Primer,  
134 Australia). The PCR conditions included initial denaturation at 94 for 2 min followed by 25 cycles of  
135 94C for 45 sec, 50C for 60 sec and 65C for 90 sec. This was followed by 9 cycles of 94C for 45 sec,  
136 65C for 90 sec and 65 for 10 min.

137

138 Several positive, no template (as negative controls) controls and DNA extraction controls (extraction  
139 blanks) were amplified along with the samples for both bacterial and fungal marker genes. PCR  
140 reaction performance was checked by loading PCR amplicons along with positive and negative  
141 controls on a 2% (w/v) agarose gel. The amplicons were quantified using a Qubit dsDNA HS Assay  
142 Kit on the Qubit 2.0 fluorometer (Life Technologies). All amplicons were subsequently pooled in one  
143 composite mixture at a concentration of 20 ng/ $\mu$ l, including negative controls. The pool was purified  
144 using AMPure XP (Beckman Coulter, Australia) and the quality of the pool was checked by visualizing  
145 on a 2% (w/v) agarose gel. The composite pool was sequenced on an Ion Torrent PGM.

146

### 147 **2.3 Sequence analysis and statistical analysis**

148 Raw sequences were de-multiplexed and quality filtered through a custom QIIME pipeline  
149 (Quantitative Insights into Microbial Ecology) (Caporaso *et al.*, 2010) with a minimum average quality  
150 score of 20. The minimum sequence length was maintained at 130 b.p. and maximum sequence length  
151 of 350 b.p. Chimeric sequences were removed using USEARCH v6.1. No forward or reverse primer  
152 mismatches or barcode errors were allowed and maximum sequence homopolymers allowed were 15.

153 The maximum number of ambiguous bases was set at six. Denovo OTU picking was performed using  
154 ULCUST at 97% sequence identity cut off values and taxonomy was assigned through the Greengenes  
155 database (version 13.8). For fungal data, taxonomy was assigned using the SILVA v123 database  
156 (Quast *et al.*, 2012).

157

158 The OTU tables obtained for different levels of taxonomy were used as measures of taxa relative  
159 abundance in univariate statistical analysis. The OTUs detected in negative controls were manually  
160 removed from the data set. Alpha ( $\alpha$ )- diversity at the phylum level for both 16S rRNA gene and ITS  
161 gene data was calculated using the richness, evenness and Shannon Weiner diversity index using the  
162 relative frequency table generated from a rarefied ‘biom’ table. Data normality was checked with the  
163 Shapiro-Wilk test and log transformations of the data were performed where appropriate. Differences  
164 in the diversity for each stage and layer (sediment, salt mat), was calculated using a two-way analysis  
165 of variance (ANOVA). Tukey HSD *post hoc* comparisons of groups were used to identify which groups  
166 were significantly different from each other.

167

168 Beta diversity ( $\beta$ ) of microbial communities was calculated with nonmetric multidimensional scaling  
169 (nMDS) using Bray-Curtis dissimilarity (Bray and Curtis, 1957). Statistical significances of  
170 dissimilarity, based on temporal data and sample layer, was assessed using main effect and pairwise  
171 ANOSIM in R using the vegan package.

172

173 Phylogeny was inferred using Phylosift (Darling *et al.*, 2014) for sequences that could not be classified  
174 past the domain level. The OTU abundance and diversity patterns were calculated using the vegan  
175 package (Dixon, 2003) in R software (R Core Team, 2014). Plots and heat maps were produced using  
176 ‘ggplot2’ (Wickham, 2011), ‘ggpubr’ packages in R and the online suite ‘Calypso’ (Zakrzewski *et al.*,  
177 2017).



## Diversity dynamics of Lake Magic

178 Predicted microbial functions of the bacteria residing within Lake Magic were generated using  
179 FAPROTAX, using default settings. FAPROTAX is a manually constructed database that maps the  
180 microbial taxa to metabolic functions (Louca *et al.*, 2016). The output from FAPROTAX was  
181 visualised in R using the ggplot2 package.

182

### 183 2.4 Chemical analysis

184 Ten grams of sediment sample for each time point was oven dried at 60°C until completely desiccated.  
185 The sample was crushed, sieved, packed in plastic bags and sent to the School of Agriculture and  
186 Environment (SAGe), University of Western Australia (UWA) chemical analysis laboratory. The  
187 analytical analysis included analysis of phosphorus, potassium, sulfur, organic carbon, nitrogen, iron,  
188 copper, sodium, boron, calcium, zinc, aluminum, magnesium and manganese. Concentrations were  
189 expressed as percentage per weight and mg/kg.

190

## 191 3. Results

### 192 3.1 Lake stages and physico-chemical parameters

193 A total of 5 time points representing 5 different stages of Lake Magic were sampled for this study.  
194 Although the lake did not go through some of the more extreme physical changes during the year, the  
195 transformation of one stage to the next was evident. Namely, we observed flooding, early evapo-  
196 concentration, mid evapo-concentration, late evapo-concentration and early flooding in the lake  
197 (**Figure 2**) details of which are presented in **Table 1** and **Table 2**. During the span of this study the  
198 lake did not reach complete desiccation due to heavy rainfall from 2017 to 2018.

199

200 The first sampling point was during late winter to early summer in 2017, where the lake was filled with  
201 several centimeters of clear blue water (July 2017) (**Figure 2A**). The lake sediment was rich in clay

202 and a small amount of wet salt mat sample was acquired. In October 2017, the lake became shallower  
203 **(Figure 2B)** during early evapo-concentration **(Table 1)**, characterized by clear water but where halite  
204 precipitation was evident on the lake shore. The lake transformed into a shallow yellow lake during  
205 January 2018 sampling **(Figure 2C)** where the surroundings of the lake were rich in halite precipitation,  
206 the lake itself exhibited a pungent acidic odour and the salt mat became desiccated and substantial.  
207 During mid-summer (March 2018) the lake bed became dry and a thick salt crust was observed on the  
208 surface of the sediment **(Figure 2D)** with visible salt crystals **(Figure 1)**, constituting the late evapo-  
209 concentration stage. At this stage the lake was also rich in iron oxide precipitation, which was evident  
210 due to its distinct colour. The final sampling timepoint was the beginning of the flooding stage in July  
211 2018 **(Figure 2E)** where the lake started to fill with water, with a concomitant dissolving of the halite  
212 and iron precipitation observed during the evapo-concentration stages. The chemical data has been  
213 summarized in **Table 2**.

214

### 215 **3.2 Temporal dynamics of the Lake Magic microbiome**

216 In order to assess the microbial community dynamics in the lake at different stages, we used 16S rRNA  
217 gene and ITS gene Ion Torrent sequencing (15 Salt mats; 15 Sediments) in triplicate. After DNA  
218 extraction, all samples had detectable amounts of DNA, but the DNA concentration was consistently  
219 higher for salt mat samples when compared to the sediment samples. However, there was no significant  
220 difference (ANOVA  $p > 0.05$ ) between diversity and richness indices of salt mat and sediment layers  
221 for both bacteria and fungi analyses **(Supplementary Figure 1)**, likely indicating minimal diversity  
222 analysis bias despite wide variations in DNA extraction concentrations. Generally, we found DNA  
223 extraction easier from salt mat samples, relative to sediment samples, due to the lower amount of clay  
224 present in the salt mat samples.

225

## Diversity dynamics of Lake Magic

226 A total of 330,913 reads were obtained for 16S rRNA microbiome analyses, representing 15947 OTUs.  
227 The OTUs were assigned to 37 phyla, 135 classes, 260 orders, 426 families and 739 genera of archaea  
228 and bacteria. Only OTUs which appeared in sequenced negative controls were discounted from the  
229 analyses and no other OTUs were filtered. This is because low abundance OTUs can have a significant  
230 effect on the diversity metrics for the microbial communities in low biomass environments, hence,  
231 filtering of OTUs with low representation in the microbiome can result in loss of crucial information.  
232 Analysis of the ITS gene sequences revealed a total of 724,490 reads, representing 4005 OTUs and  
233 were assigned to 15 phyla, 44 classes, 86 order, 177 family and 259 genera.

234

### 235 **3.3 Bacterial communities are dynamic in Lake Magic**

236 The Lake Magic microbiome OTU richness was analyzed for salt mat and sediment samples (**Figure**  
237 **3A**) at phylum level which varied significantly between the five stages of the lake (ANOVA  $p=0.001$ ).  
238 The richness index varied from 9 to 23 for 16S rRNA gene and the OTU richness was significantly  
239 higher during the EF stage (mean richness = 21). The second highest OTU richness was observed  
240 during the ME stage (mean richness = 18). The LE stage showed the lowest mean richness of 13.6,  
241 whereas, OTU richness at the FL stage was significantly different and showed a mean richness of 16.  
242 A mean richness of 15.5 was seen during EE stage.

243

244 The Lake Magic microbiome diversity varied during the different lake stages (**Figure 3B**) and followed  
245 a similar trend to that of OTU richness. The Shannon diversity index ranged from 1.61 to 2.13 for  
246 bacterial communities, where the diversity was seen to increase during EE (mean diversity = 1.65) and  
247 the ME stage (mean diversity = 1.87). However, the diversity decreased during the LE stage and was  
248 recorded as the lowest diversity index (mean diversity = 1.39) of all stages. The highest diversity was  
249 seen during the EF stage (mean diversity = 2.11). The ANOVA test was further analyzed with a *Tuckey*  
250 *post hoc* test for diversity and richness indices, which revealed that the diversity during FL, LE and EF

251 stages were significantly different from each other, whereas, the richness was significantly different  
252 only during FL and EF stages.

253

254 The Lake Magic bacterial composition under different lake stages was analyzed and are shown in  
255 (**Supplementary Figure 2**). Archaeal community diversity in the microbiome was represented by only  
256 two phyla, the *Crenarchaeota* and the *Euryarchaeota*, whilst the bacterial domain contributed the  
257 dominant microbial sequences observed within the 16S rRNA gene analyses. The majority of the  
258 sequences for bacteria originated from two phyla: *Bacteroidetes* (20%) and *Proteobacteria* (39%),  
259 most of which could not be classified below family level, indicating that a large proportion of the  
260 bacterial taxa in Lake Magic appear to be relatively poorly characterized.

261

### 262 **3.4 The bacterial community becomes more specialized as stress increases**

263 For taxa which could be classified to genera, varying trends were observed during different lake stages  
264 and within the sample layers (**Supplementary Figure 3**). Specifically, key bacterial genera fluctuated  
265 within the salt mat and sediment during the various lake stages. The correlation analysis of chemical  
266 data with the bacterial diversity revealed that microbial dynamics is strongly driven by salinity,  
267 temperature, pH and carbon content in the lake (**Supplementary Figure 4**). For instance, members of  
268 the *Acidiphilium* genus were low in abundance during the FL stage in both the salt mat and sediment  
269 samples, whilst their relative abundance was seen to increase within in the salt mat during evapo-  
270 concentration stage as the lake conditions became more stressful. A significant increase (ANOVA,  
271  $p < 0.05$ ) in *Acidiphilium* relative abundance was observed within the salt mat during the LE stage and  
272 significantly decreased during the EF stage of the lake (**Supplementary Figure 3, Acidiphilium**).  
273 Similarly, the *Acidobacterium* genus' relative abundance was high within sediment during the FL stage  
274 and a significant increase in abundance within the salt mat was seen during all evapo-concentration  
275 stages (**Supplementary Figure 3, Acidobacterium**). Similar to the *Acidiphilium*, *Acidobacterium*

## Diversity dynamics of Lake Magic

276 abundance decreased when the lake was in the EF stage. In contrast, sequences belonging to the  
277 *Arthrobacter*, *Bacillus*, *Flavobacterium* and *Sporosarcina* genera increased significantly in abundance  
278 during the EF stage in both the sediment and salt mat, whilst genera such as *Nitrososphaera* were only  
279 present during the EF stage in high abundance.

280

281 Interestingly, it was also observed that the abundance of the *Sulfurimonas*, *Syntrophobacter*,  
282 *Halothiobacillus*, *Acidobacterium*, *Acidiphilium* and *Alicyclobacillus* genera decreased during the EF  
283 stage in both the salt mat and the sediment whilst, the *Syntrophobacter* population increased in relative  
284 abundance within the sediment during LE. During the FL stage *Salinisphaera* was found to be more  
285 abundant in the salt mat when compared to the sediment. However, when compared to the LE, its  
286 abundance increased in the salt mat (**Supplementary Figure 3**). Overall, from these data it was evident  
287 that the sediment becomes more dominated by bacteria that were not specialized for surviving in the  
288 environmental conditions, whereas, the salt mat became dominated with specialized microbes such as  
289 *Salinisphaera* and *Acidobacterium*.

290

### 291 **3.5 The fungal community becomes less diverse under extreme conditions within Lake Magic**

292 The diversity and richness of the fungal community within Lake Magic significantly decreased  
293 (ANOVA,  $p < 0.001$ ) as the lake conditions became more extreme. The richness index ranged from 2  
294 to 7 whereas the Shannon diversity index ranged from 0.004 to 1.28 (**Figure 4A and 4B**). The highest  
295 mean richness was observed for the FL and EE stage. The OTU richness consistently decreased after  
296 the EE stage, with lowest OTU richness observed for the EF stage (mean richness = 2). The fungal  
297 diversity showed a varying trend when compared to OTU richness, where the highest diversity index  
298 was observed for the FL stage (mean diversity index = 1.11) whereas the lowest was observed for the  
299 extreme EF stage (mean diversity index = 0.28). A *Tuckey post hoc* test revealed that the FL and EE  
300 stage were statistically similar to each other, whilst, the ME and LE stages were statistically similar,

301 and the EF stage was significantly different from all other stages. Additionally, a *Tuckey* test for OTU  
302 richness showed that the FL, EE and EF stages were significantly different from all other stages.

303

304 Interestingly, when the fungal community composition was visualized (**Supplementary Figure 5**), an  
305 increase in unidentified fungi belonging to the Ascomycota phylum was observed. This indicated that  
306 a large portion of the fungi living in Lake Magic are likely unidentified. The salt mat during the EF  
307 stage was, however, seen to be the most diverse when compared to other time points and was abundant  
308 with the *Cladosporium* genus. Variation in the composition of other genera including *Fusarium*,  
309 *Ulocladium* and *Hostaea* was also seen.

310

### 311 **3.6 Beta diversity of the bacterial and fungal communities**

312 The dissimilarity between microbial communities at different lake stages was assessed using  
313 Nonmetric multidimensional scaling (nMDS) and Bray-Curtis dissimilarity indices. The sediment and  
314 salt mat bacterial communities from the FL, ME, LE and EF stages tightly clustered together (**Figure**  
315 **5A**). In contrast, the salt mat and sediment communities under the EE stage clustered separately  
316 (ANOSIM,  $R^2= 0.49$ ,  $p=0.001$ ). However, similar to alpha diversity, when an ANOSIM test was  
317 applied to determine the variability in the salt mat and sediment samples no significant difference was  
318 observed.

319

320 The nMDS analysis of fungal communities showed less clustering when compared to the bacterial  
321 community analysis (**Figure 5B**), where none of the lake stages clustered separately. This indicated  
322 that the members identified within the *Ascomycota* phylum vary for different lake stages (ANOSIM,  
323  $R^2=0.462$ ,  $p= 0.001$ ), but no significant difference was seen between sediments or salt mat samples.

324

325

326 **3.7 Predicted ecological functions of the bacterial communities**

327 The ecological function of the bacterial communities analyzed was predicted using the FAPROTAX  
328 pipeline for the different stages of the lake. These analyses indicated aerobic chemoheterotrophy, iron  
329 oxidation and sulphur related pathways as likely dominant functions within the lake's bacterial  
330 community (**Figure 6**). Functions related to carbon metabolism, such as methylotrophy and  
331 methanotrophy, were predicted but were not abundant. Nitrogen related functions included nitrification  
332 and ammonia oxidation and were observed to fluctuate between different lake stages. For instance,  
333 these data indicated that nitrification and ammonia oxidation were significantly higher within the salt  
334 mat during the EF stage (**Supplementary Figure 6**). Interestingly, the nitrogen related activity was  
335 also high in the sediment samples during the EE and ME lake stage. Sulphur related functions were  
336 lower during the EF stage, but significantly increased in the sediment layer during all evapo-  
337 concentration stages. Sulphur related activity was found to be highest in the sediment during the EE  
338 stage. Iron oxidation and reduction was relatively low at all timepoints, but significantly increased  
339 during the EE and LE stage within the sediment layer. Finally, Iron based respiration pathways  
340 fluctuated more frequently when compared to sulphur and nitrogen related functions during all lake  
341 stages (**Supplementary Figure 6**).

342

343 **4. Discussion**

344 Acid saline lakes in WA host unique microorganisms that can be studied to understand life under  
345 extreme conditions, novel biogeochemical processes and new biotechnological avenues (Benison *et*  
346 *al.*, 2007). In this chapter, the bacterial and fungal microbial community dynamics were studied using  
347 a temporal approach to resolve how an extreme lake microbiome changes during different stress phases  
348 due to changes in the physico-chemical properties of the habitat.

349

350 Previous studies on acidic hypersaline lakes in WA revealed a high level of bacterial diversity within  
351 Lake Magic and other WA lakes water (Mormile *et al.*, 2009; Zaikova *et al.*, 2018), but have relied  
352 upon single time (lake stage) sampling points. Our results indicate that the alpha ( $\alpha$ )-diversity of the  
353 bacterial and fungal microbial communities differed significantly between the less extreme (FL) stage  
354 and the more extreme (LE) stage. These differences indicated that the lake microbiome diversity is  
355 driven to a large degree by the high salt and low pH conditions within the lake (Podell *et al.*, 2014). It  
356 has previously been reported for hypersaline environments that the ionic concentration in these  
357 environments hinders the solubility of oxygen, and hence, the oxygen concentration is very low in acid  
358 saline lakes (Sherwood *et al.*, 1991). However, the majority of microorganisms isolated from  
359 hypersaline environments are aerobic heterotrophs who are capable of anaerobic facultative  
360 fermentation (Dyall-smith, 2009). Our results are also in line with these previous findings. Moreover,  
361 our results show that the number of OTUs in the salt mat layer were consistently higher in all samples.  
362 These results are also similar to the results obtained by Aerts *et al.*, (2019), for four acid saline lakes  
363 in Western Australia, and suggest that the majority of the microbial community diversity resides in the  
364 salt mat, where it likely has increased access to light, water and oxygen. This is likely explained by the  
365 availability of oxygen at the air/water interface, which exhibits an unequal distribution of oxygen  
366 between the salt mat and the sediment layer. Since the salt mat is directly in contact with the water  
367 column in the lake there is higher availability of oxygen locally (Podell *et al.*, 2014). Comparing the  
368 microbial composition of the salt mat and sediments in Lake Magic also indicates that microorganisms  
369 more tolerant to high salt and pH conditions are selected within the salt mat, where the conditions are  
370 harsher than those in the sediment.

371

372 The prokaryotic community at all stages of the lake cycle was dominated by halotolerant and  
373 acidophilic microorganisms, whilst archaeal taxa were found in much lower abundances. Archaeal  
374 sequences were derived from only two phyla and these observations are in good agreement with



## Diversity dynamics of Lake Magic

375 Johnson *et al.*, (2015) who observed low archaeal diversity within four acidic hypersaline lakes in  
376 Yilgarn Craton. It has been reported for Lake Tyrell in Victoria, Australia, that succession of different  
377 microorganisms is dependent upon the solutes present in the lakes (Podell *et al.*, 2014). Hence, the  
378 variation in solute concentration in Lake Magic at different stages is likely driving the succession of  
379 archaea and bacteria. It could also be hypothesised that bacterial taxa outcompete archaeal taxa in these  
380 unique environments because of the dynamic nature of the WA lakes, where environmental changes  
381 are frequent and, therefore, stress tolerant species are selected, as opposed to obligate archaeal  
382 extremophiles (Benison and Bowen, 2006).

383

384 Organic carbon and nitrogen values were found to be low at all lake stages and increased slightly during  
385 the flooded (FL) stages, in line with previous studies in similar lakes in WA (Ruecker *et al.*, 2016;  
386 Aerts *et al.*, 2019). Similarly, phosphorus levels were also low in Lake Magic, as in other WA lakes  
387 (Aerts *et al.*, 2019), with phosphorus often being considered a limiting factor along with carbon and  
388 nitrogen for the growth of microorganisms (Elser *et al.*, 2007). Microbiome community analyses  
389 indicated an abundant community of heterotrophs within the lake and hence, low carbon, nitrogen and  
390 phosphorus are likely to be responsible for the low the biomass in these samples (Aerts *et al.*, 2019).  
391 However, carbon and nitrogen levels were highest during the ME and these increases are likely due to  
392 photosynthetic inputs via blooming of the saline tolerant algae *Dunaliella*. This is also reflected in the  
393 increased microbial diversity during the ME stage. Blooming of algae commonly occurs during this  
394 lake stage and provides a source of photosynthetically derived nutrient input which causes increased  
395 diversity in the lake (Zaikova *et al.*, 2018).

396

397 During the evapo-concentration stages iron concentrations increased which was also mirrored in the  
398 predicted microbiome functions of increased iron respiration activity within the bacterial community.  
399 Iron metabolism is considered an important function of the sediment inhabitants and is thought to be

400 responsible for the lowering of pH in the sediment (Lu *et al.*, 2016; Zaikova *et al.*, 2018). The  
401 *Alicyclobacillus* genus members are reported to be involved in iron oxidation along with archaea in  
402 other acid saline lakes in WA (Johnson *et al.*, 2015; Lu *et al.*, 2016). The members of the genus are  
403 also capable of reducing iron (Yahya *et al.*, 2008; Lu *et al.*, 2010). Previous metagenomic studies of  
404 Lake magic indicated that *Alicyclobacillus* was the most abundant genus within the sediment.  
405 Moreover, the *Acidiphilium* genus was also found to be abundant in the sediment samples (Zaikova *et*  
406 *al.*, 2018) with members of this genus are involved in iron reduction (Weber *et al.*, 2006; Sánchez-  
407 Andrea *et al.*, 2011; Zaikova *et al.*, 2018).

408

409 These data indicated, that the abundance of the *Alicyclobacillus* and *Acidiphilium* genera varied across  
410 different lake stages and is likely more complicated than first thought, in terms of lake biogeochemistry  
411 (Zaikova *et al.*, 2018). *Alicyclobacillus* abundance was significantly higher in sediment samples during  
412 the FL stage and was significantly increased during the EE stage within the salt mat samples. In contrast  
413 the, *Acidiphilium* genus was more abundant within the salt mat samples during the later LE stage.  
414 Interestingly the overall abundance of these genera decreased during the higher stress stages of the  
415 lake. Previously it has been suggested that archaea dominate iron oxidation in acid saline extreme  
416 environment and that the role of bacteria is limited. Moreover, the Iron activity is known to decrease  
417 by the presence of high salt in the environment (Lu *et al.*, 2016). In the study, *Acidiphilium* spp. were  
418 isolated from an acid saline lake in WA which formed long filamentous structures during low pH and  
419 high salinity conditions indicating that these species have developed a coping mechanism for extreme  
420 stress (Lu *et al.*, 2016). Examining the functional profile of our samples it can be seen that predicted  
421 iron respiration would increase significantly in the sediment during the EE and LE stage and is the  
422 lowest in the sediment during the FL stage potentially because of the coping mechanism adapted by  
423 these species.

424

## Diversity dynamics of Lake Magic

425 The activity of acidophiles is known to decrease significantly in presence of high concentration of  
426 chloride ions (Suzuki *et al.*, 1999; Shiers *et al.*, 2005). However, Lu *et al.*, (2016) found that  
427 *Acidiphilium* spp. formed long filaments as a coping mechanism to high chloride ions within the  
428 Dalyup river in WA. These data, in concert with previous results, suggest that iron metabolism is  
429 affected by the presence of chloride ions and we hypothesise that this may explain the bacterial spp. of  
430 *Alicyclobacillus* and *Acidiphilium* being dominant during EE and FL stages. These data also suggest  
431 that under the high chloride conditions, based upon community data, these species are responsible of  
432 lowering the pH in the sediment. Hence, we postulate from these results that microorganisms in Lake  
433 Magic adapt to stressful conditions of pH and salinity not only physiologically, but also play crucial  
434 roles in changing their external environment making it more habitable for themselves and other  
435 members of the Lake.

436

437 One of the most abundant genera detected in these data was the *Salinisphaera* (7%), in both the  
438 sediment and salt mat. *Salinisphaera* species are mesophilic, halotolerant and slightly acidophilic (pH  
439 range 5.0-7.5), surviving in a range of moderately acidic and saline conditions as well as high  
440 concentrations of metal ions. Species belonging to the *Salinisphaera* genus have been isolated from a  
441 range of environments, including hydrothermal vents, solar salterns, brine from salt wells, seawater  
442 and marine fish surfaces (Antunes *et al.*, 2003; Mormile *et al.*, 2007; Crespo-Medina *et al.*, 2009; Bae  
443 *et al.*, 2010; Gi *et al.*, 2010; Park *et al.*, 2012; Zhang *et al.*, 2012; Shimane *et al.*, 2013). Critically,  
444 these species are able to metabolize both autotrophically and heterotrophically (Antunes *et al.*, 2003;  
445 Crespo-Medina *et al.*, 2009; Bae *et al.*, 2010; Antunes *et al.*, 2011a; Park *et al.*, 2012; Zhang *et al.*,  
446 2012; Shimane *et al.*, 2013). In addition, *Salinisphaera* species are also involved in the uptake of iron  
447 and siderophore production (Antunes *et al.*, 2003). Molecular studies here indicated that the abundance  
448 of *Salinisphaera* was consistently high in salt mats during all lake stages, except during the flooded  
449 (FL) stage, where it was more abundant within the sediment. *Salinisphaera* was previously reported to

450 be the single most dominant OTU in the lake water (Zaikova *et al.*, 2018) during evapo-concentration  
451 in Lake Magic. These findings together indicate that most of the *Salinisphaera* spp. reside in the water  
452 column of Lake Magic. The dramatic increase in its representation during the LE stage in the salt mat  
453 and sediment suggests that it is highly tolerant of extreme pH and acidic environmental conditions,  
454 including tolerance to heavy metal ions, allowing it to survive through the evapo-concentration stages.  
455  
456 Members of the *Sulfurimonas* genus have been isolated from diverse environments such as  
457 hydrothermal vents, marine sediments and terrestrial habitats and are known to play an important role  
458 in chemoautotrophic processes (Han and Perner, 2015). The members of this genus can grow on a  
459 variety of electron donors and acceptors and, thus, are able to colonize disparate environments. These  
460 include different reduced sulphur compounds such as sulphide, elemental sulphur, sulphite and  
461 thiosulfate (Han and Perner, 2015). Many members of the genus are also involved in nitrogen and  
462 hydrogen metabolism. In our samples, *Sulfurimonas* (1.2%) abundance continuously decreased in salt  
463 mats but increased in abundance within the sediments as the environmental conditions became more  
464 stressful. Ultimately, it decreased significantly during the most extreme (LE) lake stages but still  
465 maintained a low representation in the sediment. When examining the functional profile data, sulphur  
466 respiration significantly increased in the sediment samples during the evapo-concentration stages,  
467 suggesting that *Sulfurimonas* spp play a crucial role in cycling key nutrients in the sediment. Since the  
468 members of the genus are able to survive chemolithoautotrophically using various electron acceptors  
469 and donors (Campbell *et al.*, 2006; Grote *et al.*, 2008), it suggests that these species are capable of  
470 adapting to the changing environmental conditions of Lake Magic. A similar trend of abundance was  
471 seen for *Flavobacterium*, *Bacillus* and *Syntrophobacter* genera where their abundances increased in  
472 the sediment during the evapo-concentration stages and we postulate that they play a crucial role in  
473 niche construction by interacting with other dominant taxa as the stress increases.

## Diversity dynamics of Lake Magic

474 The fungal diversity was seen to decrease as the environmental conditions became more extreme. A  
475 single phylum, Ascomycota (76.8%) became dominant as the lake became dry and hypersaline. Most  
476 of the members of this phylum are unidentified, and hence, most of the fungi residing in Lake Magic  
477 are either novel, or the sequence length of the marker gene used in this study is not sufficient to be able  
478 to characterise these members. It can be deduced that these fungi are tolerant of the acidic hypersaline  
479 conditions of the lake. In a previous study on Lake Magic microbiology, the water samples were found  
480 to be highly diverse in terms of eukaryotic community composition, being abundant (~98.5%) in  
481 Ascomycota. *Aspergillus* and *Penicillium* were the most abundant genera in Lake Magic water.  
482 However, the results for sediment samples were quite similar to our results (Zaikova *et al.*, 2018). The  
483 presence of the halotolerant algae *Dunaleilla* during evapo-concentration stages is a major contributor  
484 to carbon content in the lake. It can be deduced from the data that as *Dunaleilla* increase in the Lake  
485 (during ME) the diversity in the salt mat increases rapidly. Interestingly, this difference in the diversity  
486 of lake water and sediment column indicates the exchange between the two compartments in terms of  
487 nutrition. The water column is more abundant in oxygen and has access to sunlight whilst, the higher  
488 composition of eukaryotes in the water column which contribute to the carbon and nitrogen content in  
489 the salt mat and the sediment.

490

491 In conclusion, our results highlight that the diversity in Lake Magic is strongly driven by the pH and  
492 salt concentrations at different stages of the lake. In both the salt mat and sediment samples, bacteria  
493 were found to be more abundant in the lake, comprising of halotolerant and acidotolerant species and  
494 only a small representation of archaea was seen. We can conclude from our results that, the sediment  
495 was seen to become more specialised in microorganisms involved in buffering their external  
496 environment, evident from the increase in abundance of acidotolerant and halotolerant species involved  
497 in various functions such as sulphur and iron metabolism. Moreover, due to microbial activity the  
498 environmental conditions do not change to the same degree in the sediment when compared to the salt

499 mat, resulting in a safe haven for microbes, where they are able to thrive during extreme conditions.  
500 These findings confirm our hypothesis that during stressed conditions, microorganisms extensively  
501 rely on associations with other microorganisms and the interactions increasingly become positive  
502 (Piccardi *et al.*, 2019). This also suggests that microbial interactions are involved in stabilising the  
503 ecosystem and is responsible for the resistance and resilience of these communities (Zengler and  
504 Zaramela, 2018; Naidoo *et al.*, 2019).

505

506 **References**

- 507 Aerts JW, van Spanning RJM, Flahaut J, Molenaar D, Bland PA, Ehrenfreund P, Martins Z (2019). Microbial Communities  
508 in Sediments From Four Mildly Acidic Ephemeral Salt Lakes in the Yilgarn Craton (Australia) – Terrestrial  
509 Analogs to Ancient Mars. *Front Microbiol*;10:779.
- 510 Antunes A, Eder W, Fareleira P, Santos H, Huber R (2003). *Salinisphaera shabanensis* gen. nov., sp. nov., a novel,  
511 moderately halophilic bacterium from the brine-seawater interface of the Shaban Deep, Red Sea. *Extremophiles*;  
512 7(1):29-34.
- 513 Antunes A, Ngugi DK, Stingl U (2011). Microbiology of the Red Sea (and other) deep-sea anoxic brine lakes. *Environ*  
514 *Microbiol Rep*; 3(4):416–33.
- 515 Bae GD, Hwang CY, Kim HM, Cho BC (2010). *Salinisphaera dokdonensis* sp. nov., isolated from surface seawater. *Int J*  
516 *Syst Evol Microbiol*; 60(3):680–5.
- 517 Benison KC, Beitler Bowen B, Oboh-Ikuenobe FE, Jagniecki EA, Laclair DA, Story SL, Melanie RM, Hong B-Y (2007).  
518 Sedimentology of acid saline lakes in Southern Western Australia: newly described processes and products of an  
519 extreme environment. *J Sediment Res*; 77:366–88.
- 520 Benison KC, Bowen BB (2006). Acid saline lake systems give clues about past environments and the search for life on  
521 Mars. *Icarus*; 183(1):225–9.
- 522 Bowen BB, Benison KC (2009). Geochemical characteristics of naturally acid and alkaline saline lakes in southern Western  
523 Australia. *Appl Geochemistry* 24(2):268–84.
- 524 Bray JR, Curtis JT (1957). An Ordination of the Upland Forest Communities of Southern Wisconsin. *Ecol Monogr*;  
525 27(4):325–49.
- 526 Campbell BJ, Engel AS, Porter ML, Takai K (2006). The versatile  $\epsilon$ -proteobacteria: Key players in sulphidic habitats.  
527 *Nature Reviews Microbiology*; 4: 458–68.
- 528 Caporaso JG, Kuczynski J, Stombaugh J, Bittinger K, Bushman FD, Costello EK, Fierer N, Pena, AG, Goodrich, JK,  
529 Gordon, JI, Huttley, GA (2010). QIIME allows analysis of high-throughput community sequencing data. *Nat*  
530 *Methods*; 7(5): 335.
- 531 ChénardCh C, Wijaya W, Vaultot D, Lopes dos Santos A, Martin P, Kaur A, Federico L (2019). Temporal dynamics of  
532 Bacteria, Archaea and protists in equatorial coastal waters. *bioRxiv*; 658278.
- 533 Conner AJ, Benison KC (2013). Acidophilic Halophilic Microorganisms in Fluid Inclusions in Halite from Lake Magic,  
534 Western Australia. *Astrobiology*13(9):850–60.

- 535 Crespo-Medina M, Chatziefthimiou A, Cruz-Matos R, Pérez-Rodríguez I, Barkay T, Lutz RA, Starovoytov V, Vetriani C  
536 (2009). *Salinisphaera hydrothermalis* sp. nov., a mesophilic, halotolerant, facultatively autotrophic, thiosulfate-  
537 oxidizing gammaproteobacterium from deep-sea hydrothermal vents, and emended description of the genus  
538 *Salinisphaera*. *Int J Syst Evol Microbiol*; 59(6):1497–503.
- 539 Cruaud P, Vigneron A, Fradette M-S, Dorea CC, Culley AI, Rodriguez MJ, Steve J (2019). Annual Protist Community  
540 Dynamics in a Freshwater Ecosystem Undergoing Contrasted Climatic Conditions: The Saint-Charles River  
541 (Canada). *Front Microbiol*; 10: 2359.
- 542 Darling AE, Jospin G, Lowe E, Matsen FA, Bik HM, Eisen JA (2014). PhyloSift: phylogenetic analysis of genomes and  
543 metagenomes. *PeerJ*; 2:e243.
- 544 Dixon P (2003). VEGAN, a package of R functions for community ecology. *J Veg Sci*; 14:927–30.
- 545 Dopson M, Holmes DS, Lazcano M, McCredden TJ, Bryan CG, Mulroney KT, et al (2017). Multiple Osmotic Stress  
546 Responses in *Acidihalobacter prosperus* Result in Tolerance to Chloride Ions. *Front Microbiol* 7:2132.
- 547 Dyll-Smith, M. (2009) ‘The Halohandbook. Protocols for haloarchaeal genetics’, version 7.2.
- 548 Elser JJ, Bracken MES, Cleland EE, Gruner DS, Harpole WS, Hillebrand H, Jacqueline TN, Eric WS, Jonathan BS, Jennifer  
549 ES (2007). Global analysis of nitrogen and phosphorus limitation of primary producers in freshwater, marine and  
550 terrestrial ecosystems. *Ecol Lett*; 10(12):1135–42.
- 551 Gi DB, Chung YH, Hye MK, Byung CC (2010). *Salinisphaera dokdonensis* sp. nov., isolated from surface seawater. *Int J*  
552 *Syst Evol Microbiol*; 60(3):680–5.
- 553 Grote J, Jost G, Labrenz M, Herndl GJ, Jürgens K (2008). Epsilonproteobacteria represent the major portion of  
554 chemoautotrophic bacteria in sulfidic waters of pelagic redoxclines of the baltic and black seas. *Appl Environ*  
555 *Microbiol*; 74(24):7546–51.
- 556 Han Y, Perner M (2015). The globally widespread genus *Sulfurimonas*: versatile energy metabolisms and adaptations  
557 to redox clines. *Front Microbiol*; 6:989.
- 558 Heidelberg KB, Nelson WC, Holm JB, Eisenkolb N, Andrade K, Emerson JB (2013). Characterization of eukaryotic  
559 microbial diversity in hypersaline Lake Tyrrell, Australia. *Front Microbiol* 4:115.
- 560 Johnson SS, Chevrette MG, Ehlmann BL, Benison KC (2015). Insights from the metagenome of an acid salt lake: the role  
561 of biology in an extreme depositional environment. *PLoS One* 10(4):e0122869.
- 562 Ju F, Zhang T (2014). Bacterial assembly and temporal dynamics in activated sludge of a full-scale municipal wastewater  
563 treatment plant. *ISME J*;9(3):683.



## Diversity dynamics of Lake Magic

- 564 Louca S, Parfrey LW, Doebeli M (2016). Decoupling function and taxonomy in the global ocean microbiome. *Science*  
565 ;353(6305):1272–7.
- 566 Lu S, Gischkat S, Reiche M, Akob DM, Hallberg KB, Küsel K (2010). Ecophysiology of Fe-cycling bacteria in acidic  
567 sediments. *Appl Environ Microbiol*; 76(24):8174–83.
- 568 Lu S, Peiffer S, Lazar CS, Oldham C, Neu TR, Ciobota V, Nab O, Lillicrap A, Rosch P, Popp J, Kusel K (2016).  
569 Extremophile microbiomes in acidic and hypersaline river sediments of Western Australia. *Environ Microbiol Rep*;  
570 8(1):58–67.
- 571 Mormile MR, Hong B, Adams NT, Benison KC, Oboh-Ikuenobe F. Characterization of a moderately halo-acidophilic  
572 bacterium isolated from Lake Brown, western Australia (2007). *International Society for Optics and Photonics*;  
573 66940X.
- 574 Mormile MR, Hong B-Y, Benison KC (2009). Molecular Analysis of the Microbial Communities of Mars Analog Lakes  
575 in Western Australia. *Astrobiology* ;9(10):919–30.
- 576 Naidoo RK, Simpson ZF, Oosthuizen JR, Bauer FF (2019). Nutrient Exchange of Carbon and Nitrogen Promotes the  
577 Formation of Stable Mutualisms Between *Chlorella sorokiniana* and *Saccharomyces cerevisiae* Under Engineered  
578 Synthetic Growth Conditions. *Front Microbiol*;10:609.
- 579 Nagarkar M, Countway PD, Du Yoo Y, Daniels E, Poulton NJ, Palenik B (2018). Temporal dynamics of eukaryotic  
580 microbial diversity at a coastal Pacific site. *ISME J*;12(9):2278–91.
- 581 Park S-J, Cha I-T, Kim S-J, Shin K-S, Hong Y, Roh D-H, Sung K-R (2012). *Salinisphaera orenii* sp. nov., isolated from a  
582 solar saltern. *Int J Syst Evol Microbiol*; 62(8):1877–83.
- 583 Piccardi P, Vessman B, Mitri S (2019). Toxicity drives facilitation between 4 bacterial species. *Proc Natl Acad Sci USA*;  
584 116(32):15979-1584.
- 585 Podell S, Emerson JB, Jones CM, Ugalde JA, Welch S, Heidelberg KB, Banfield JF, Aleen EE (2014). Seasonal fluctuations  
586 in ionic concentrations drive microbial succession in a hypersaline lake community. *ISME J*; 8(5):979–90.
- 587 Quast C, Pruesse E, Yilmaz P, Gerken J, Schweer T, Yarza P, Peplies J, Glockner FO (2012). The SILVA ribosomal RNA  
588 gene database project: improved data processing and web-based tools. *Nucleic Acids Res*; 41(D1):D590–6.
- 589 R Core Team (2014). R: A language and environment for statistical computing. R Foundation for Statistical Computing,  
590 Vienna, Austria.
- 591 Ruecker A, Schröder C, Byrne J, Weigold P, Behrens S, Kappler A (2016). Geochemistry and Mineralogy of Western  
592 Australian Salt Lake Sediments: Implications for Meridiani Planum on Mars. *Astrobiology*;16(7):525–38.

- 593 Sánchez-Andrea I, Rodríguez N, Amils R, Sanz JL (2011). Microbial diversity in anaerobic sediments at Río Tinto, a  
594 naturally acidic environment with a high heavy metal content. *Appl Environ Microbiol*; 77(17):6085–93.
- 595 Sherwood JE, Stagnitti F, Kokkinn MJ, Williams WD (1991). Dissolved oxygen concentrations in hypersaline waters.  
596 *Limnol Oceanogr*; 36(2):235–50.
- 597 Shiers DW, Blight KR, Ralph DE (2005). Sodium sulphate and sodium chloride effects on batch culture of iron oxidising  
598 bacteria. *Hydrometallurgy*; 80(1–2):75–82.
- 599 Shimane Y, Tsuruwaka Y, Miyazaki M, Mori K, Minegishi H, Echigo A, Ohta Y, Maruyama T, Grant WD, Hatada Y  
600 (2013). *Salinisphaera japonica* sp. nov., a moderately halophilic bacterium isolated from the surface of a deep-sea  
601 fish, *Malacocottus gibber*, and emended description of the genus *Salinisphaera*. *Int J Syst Evol Microbiol*;  
602 63(6):2180–5.
- 603 Suzuki I, Lee D, Mackay B, Harahuc L, Oh JK (1999). Effect of various ions, pH, and osmotic pressure on oxidation of  
604 elemental sulfur by *Thiobacillus thiooxidans*. *Appl Environ Microbiol*; 65(11):5163–8.
- 605 Weber KA, Achenbach LA, Coates JD (2006). Microorganisms pumping iron: Anaerobic microbial iron oxidation and  
606 reduction. *Nature Reviews Microbiology*; 4:752–64.
- 607 Whiteley AS, Jenkins S, Waite I, Kresoje N, Payne H, Mullan B, Richard A, Anthony OD (2012). Microbial 16S rRNA  
608 Ion Tag and community metagenome sequencing using the Ion Torrent (PGM) Platform. *J Microbiol Methods*;  
609 91(1):80–8.
- 610 Wickham H (2011). *ggplot2*. *Wiley Interdiscip Rev Comput Stat*; 3(2):180–5.
- 611 Yahya A, Hallberg KB, Johnson DB (2008). Iron and carbon metabolism by a mineral-oxidizing *Alicyclobacillus*-like  
612 bacterium. *Arch Microbiol*; 189(4):305–12.
- 613 Zaikova E, Benison KC, Mormile MR, Johnson SS (2018). Microbial communities and their predicted metabolic functions  
614 in a desiccating acid salt lake. *Extremophiles*, 22(3):367–79.
- 615 Zengler K, Zaramela LS (2018). The social network of microorganisms — how auxotrophies shape complex communities.  
616 *Nat Rev Microbiol*; 16(6):383–90.
- 617 Zhang YJ, Tang SK, Shi R, Klenk HP, Chen C, Yang LL, Zhou Y, Li WJ (2012). *Salinisphaera halophila* sp. nov., a  
618 moderately halophilic bacterium isolated from brine of a salt well. *Int J Syst Evol Microbiol*; 62(9):2174–9.
- 619
- 620
- 621

## Diversity dynamics of Lake Magic

### 622 **Figure legends**

623 **Figure 1:** A single core of sample (~6 cm long) showing the salt mat and sediment sections. The bottom  
624 figure shows the salt mat with salt crystals on the top of sediment, sampled as a separate sample.

625

626 **Figure 2:** Five stages of Lake Magic in a span of one-year (a) July 2017, flooded (b) October 2017,  
627 early evapo-concentration (c) January 2018, mid evapo-concentration (d) March 2018, late evapo-  
628 concentration (e) July 2018, early flooding.

629

630 **Figure 3:** (a) 16S rRNA gene OTU richness (ANOVA,  $p=0.001$ ) and (b) Shannon diversity index  
631 (ANOVA,  $p<0.001$ ) at phylum level. The letters show significant differences as obtained with Tuckey  
632 post hoc test. Colours represent: ● Sediment ● Salt mat. ● FL ● EE ● ME ● LE ● EF

633

634 **Figure 4:** (a) ITS gene OTU richness (ANOVA,  $p=0.001$ ) and (b) Shannon diversity index (ANOVA,  
635  $p<0.001$ ) at phylum level. The letters show significant differences as obtained with *Tuckey post hoc*  
636 test. Colours represent: ● Sediment ● Salt mat ● FL ● EE ● ME ● LE ● EF

637

638 **Figure 5:** Beta diversity of (A) 16S rRNA (B) ITS sequences for different time points and layers.  
639 Samples are coloured according to the time points and shaped according to the layer

640

641 **Figure 6:** Dot plot showing the FAPROTAX predicted functions of the bacterial community within  
642 the salt mat and sediment samples at different lake stages.

643

644

645

646

| Sample code | Date collected | Lake stage          |        | pH            | EC               | Temperature (°C) | Lake description                                                                                                      |
|-------------|----------------|---------------------|--------|---------------|------------------|------------------|-----------------------------------------------------------------------------------------------------------------------|
| FL          | July 2017      | Flooded             |        | 4.5*<br>4.2^  | 7*<br>73.5^      | 16               | Clear blue lake water, very thin salt mat layer                                                                       |
| EE          | October 2017   | Early concentration | evapo- | 4.5*<br>4.1^  | 11.3*<br>78.3^   | 25               | Shallow blue water, salt mat becomes more evident                                                                     |
| ME          | January 2018   | Mid concentration   | evapo- | 4.5*<br>3.4^  | 15.95*<br>146.9^ | 28               | Yellow slime water, salt foams forms on the lakeshore, thick salt mat layer develops, strong pungent smell in the air |
| LE          | March 2018     | Late concentration  | evapo- | 4.2*<br>2.7^  | 41.8*<br>223.8^  | 33               | A thick layer of salt mat with visible halite precipitation as crystals                                               |
| EF          | July 2018      | Early flooding      |        | 4.8*<br>3.41^ | 55.9*<br>226.7^  | 24               | Salt mat intact, water fills the dry lake bed, clear blue water                                                       |

647 **Table 1:** Description of sampling site at different sampling time points (\* sediment, ^ lake water), (EC calculate in mS/cm)

648

649

| Stage                            | Sampling time     | % Carbon | % Nitrogen | Al (mg/kg) | B (mg/kg) | Ca (mg/kg) | Cu (mg/kg) | Fe (mg/kg) | K (mg/kg) | Mg (mg/kg) | Mn (mg/kg) | Na (mg/kg) | P (mg/kg) | S (mg/kg) | Zn (mg/kg) |
|----------------------------------|-------------------|----------|------------|------------|-----------|------------|------------|------------|-----------|------------|------------|------------|-----------|-----------|------------|
| <b>Early flooding</b>            | <b>July 2018</b>  | 1.56     | 0.064      | 1186       | 6.8       | 10790      | 0.7        | 33         | 781       | 2661       | 1.5        | 33759      | 7.4       | 9190      | 0.2        |
| <b>Late evapo-concentration</b>  | <b>March 2018</b> | 0.739    | 0.085      | 1099       | 7.5       | 20565      | 0.6        | 77         | 1065      | 2750       | 2.5        | 37861      | 8         | 16261     | 0.2        |
| <b>Mid evapo-concentration</b>   | <b>Jan 2018</b>   | 1.30     | 0.088      | 1256       | 5.7       | 2750       | 0.6        | 52         | 598       | 1462       | 1.5        | 19260      | 12        | 2591      | 0.2        |
| <b>Early evapo-concentration</b> | <b>Oct 2017</b>   | 0.597    | 0.061      | 1023       | 3.6       | 11308      | 0.4        | 47         | 357       | 733        | 0.9        | 9526       | 10        | 8716      | 0.1        |
| <b>Flooding</b>                  | <b>July 2017</b>  | 1.01     | 0.062      | 1007       | 3.7       | 350        | 0.8        | 64         | 323       | 587        | 0.6        | 7056       | 6         | 488       | 0.1        |

**Table 2:** Chemical data for samples at different time points. All values shown are assessed using a single sample at each time point.

650

651

652

653

654

655

656

657

658

659

660

661

662

663

664

665

666

667

668

669

670

671

672

673

674

675

676

677

678

679

680

681

682

683

684

685



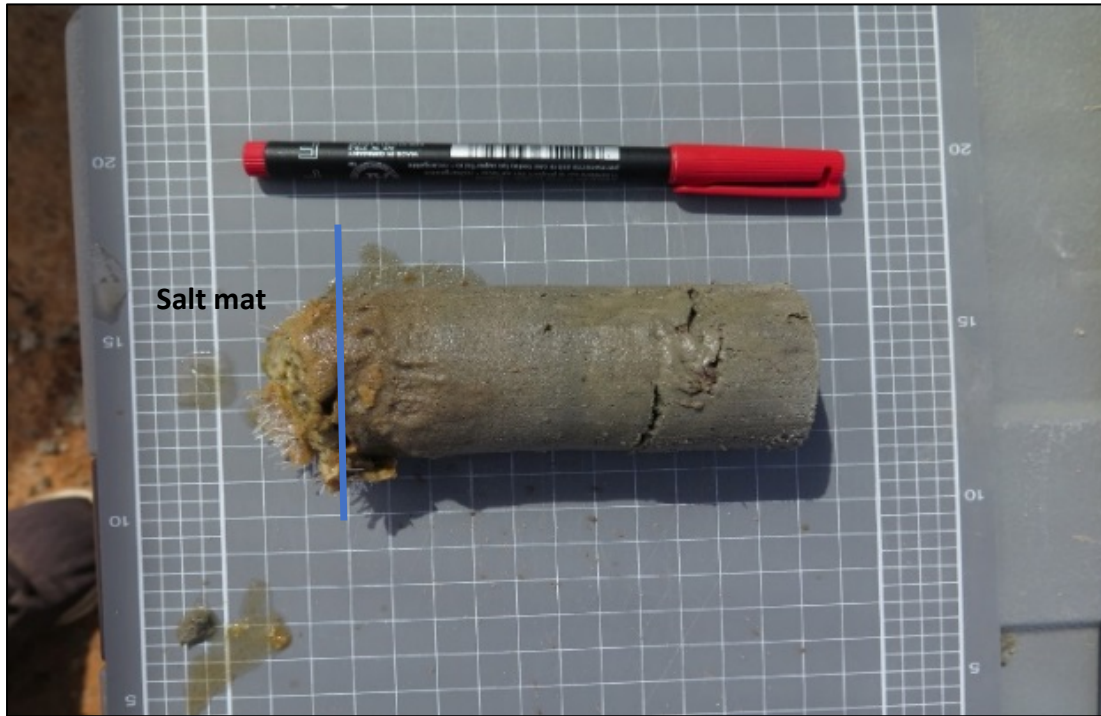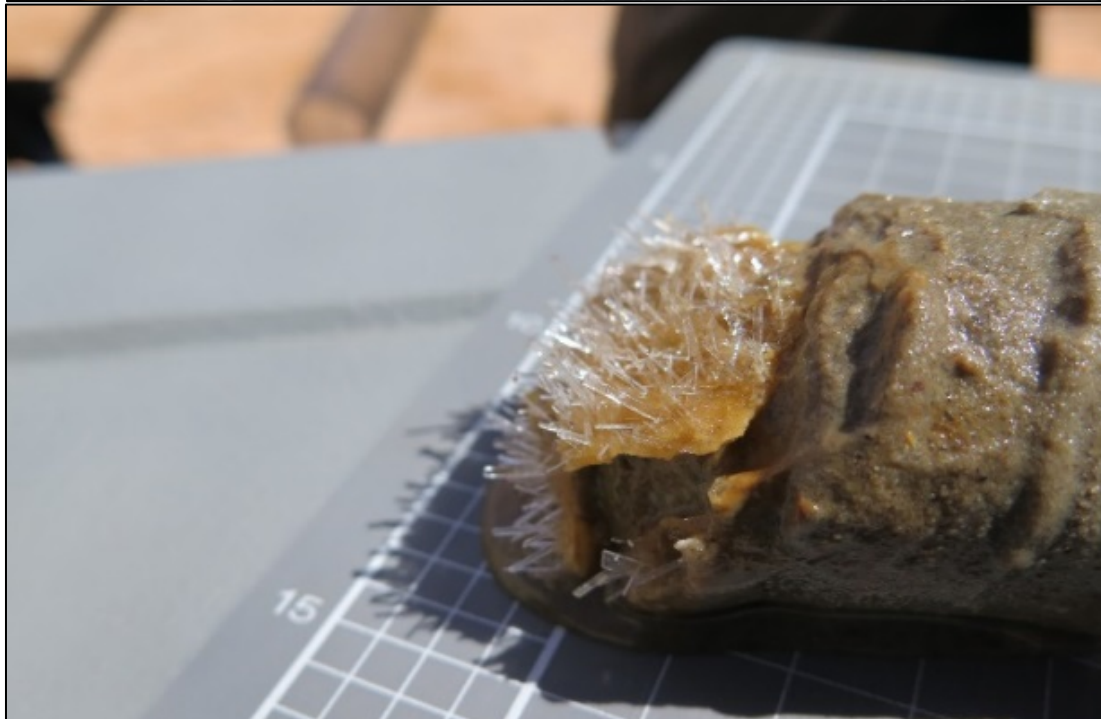

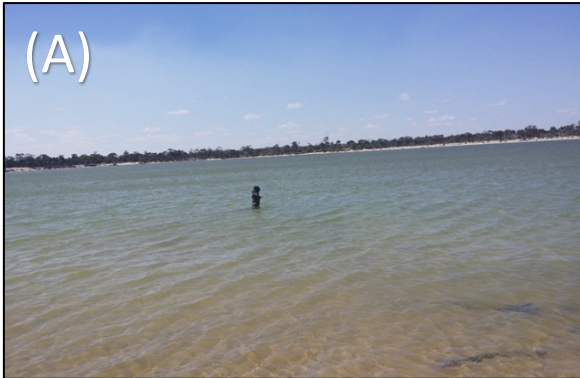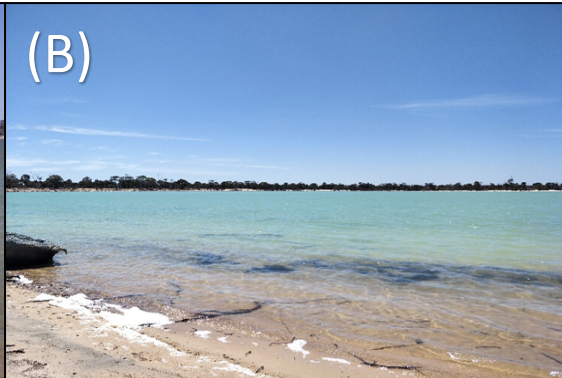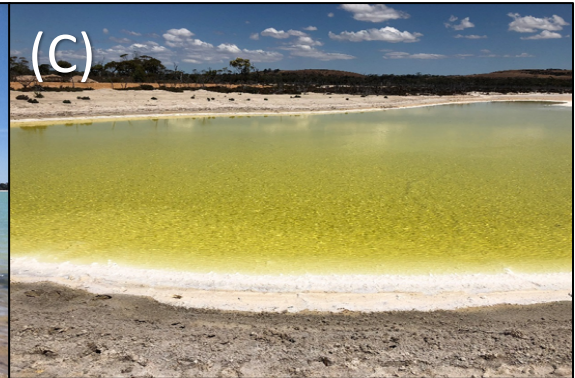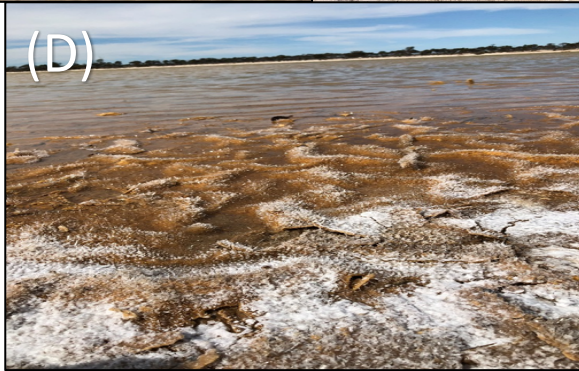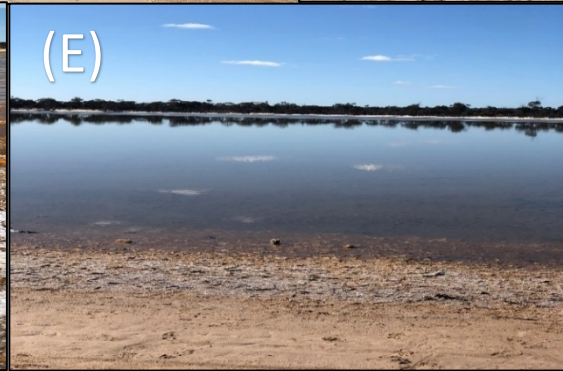

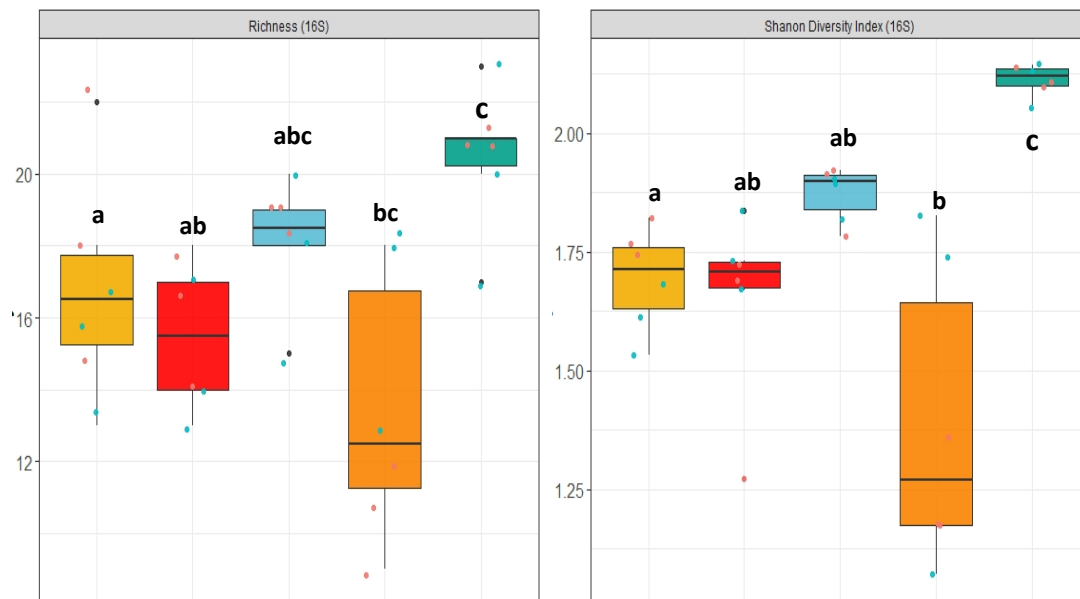

Figure 3A and 3B

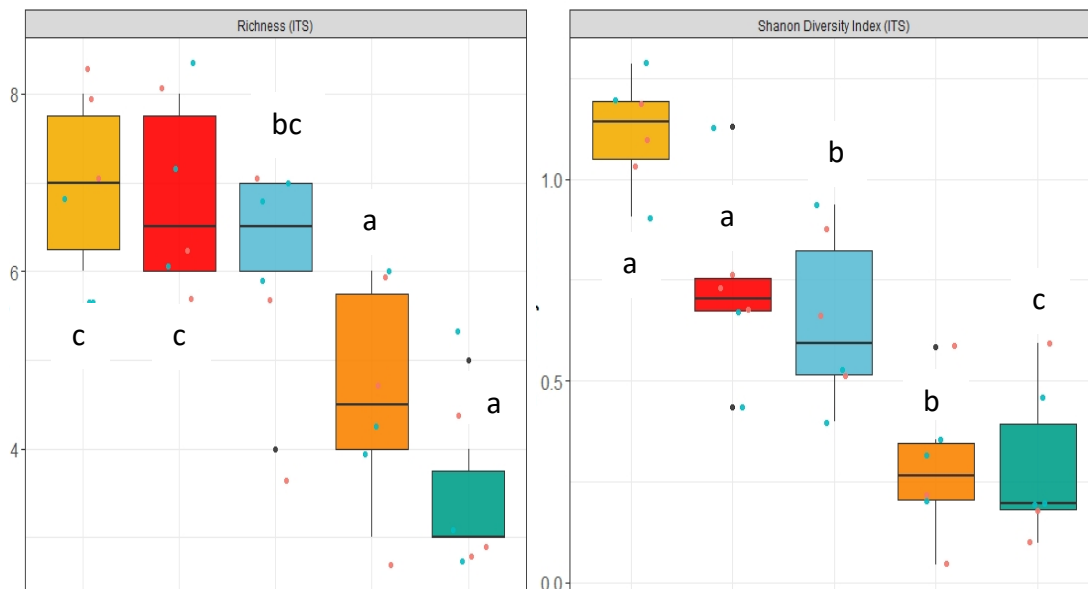

Figure 4A and 4B

Figure 5A and 5B

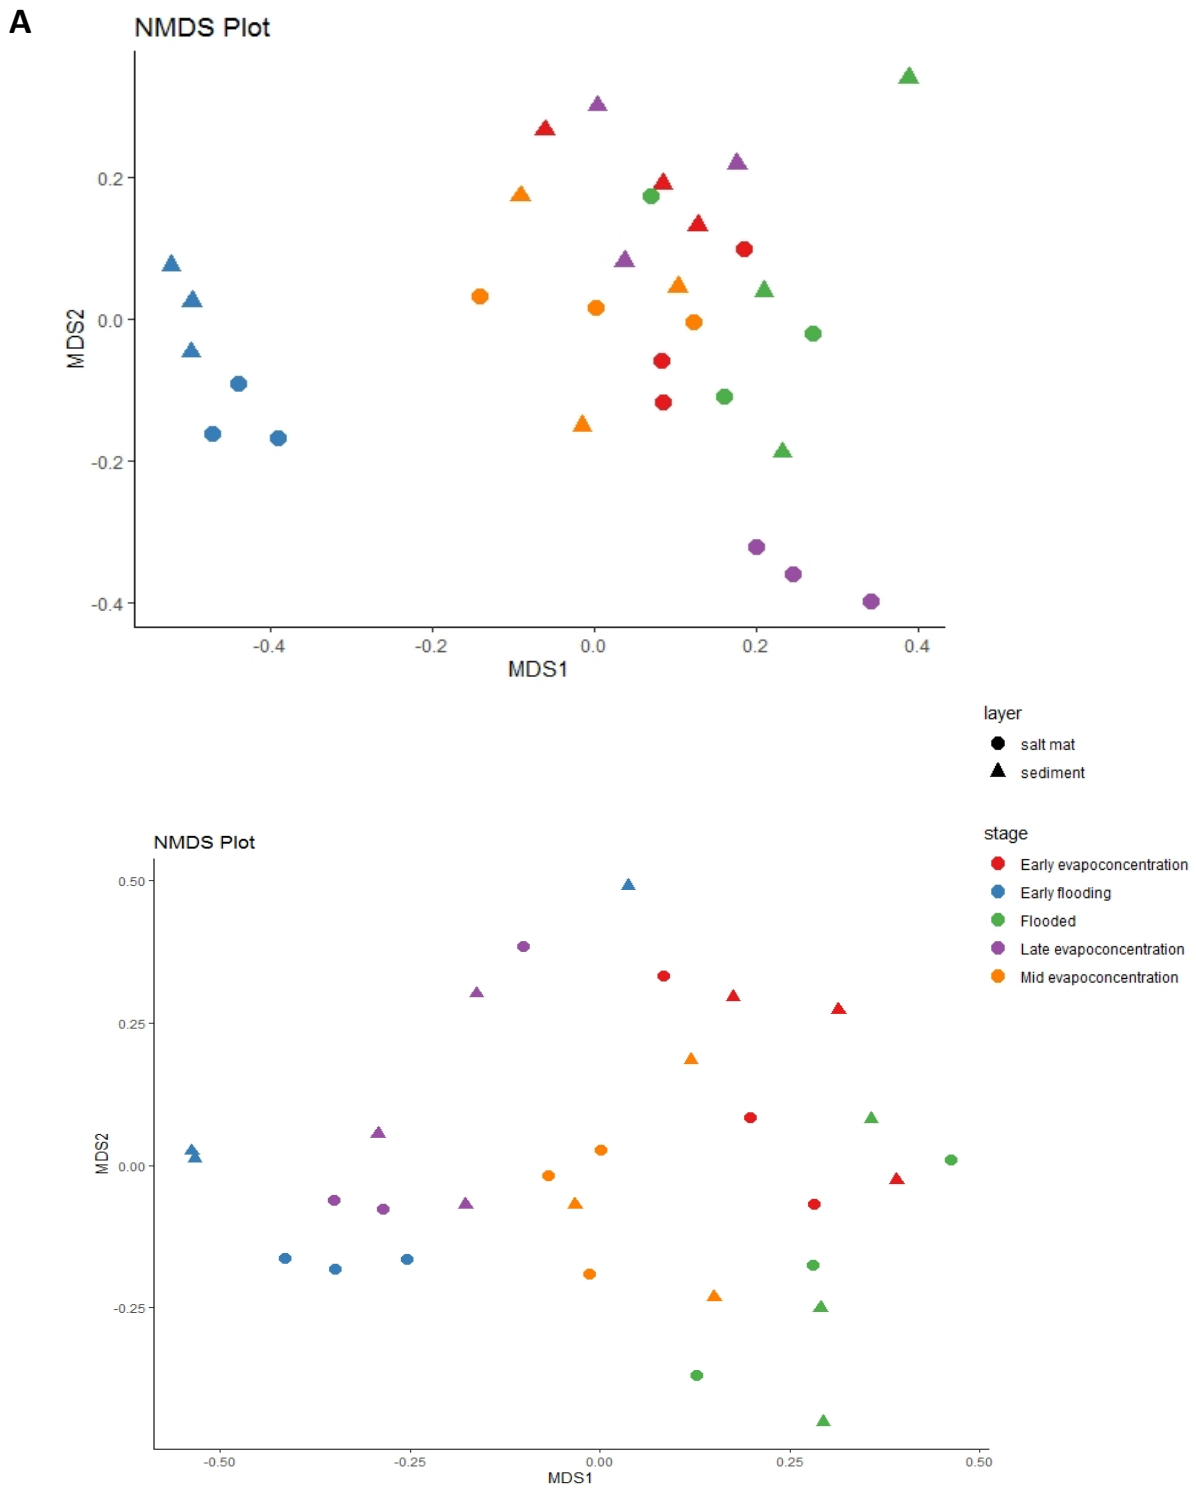

Source: https://biorxiv.org/content/10.1101/2020.12.17.423355v1.full.pdf
